# Supplementary material for: Downregulation of 15‐hydroxyprostaglandin dehydrogenase by interleukin‐1β from activated macrophages leads to poor prognosis in pancreatic cancer
Source: PubMed Central journal article supplement — Cancer Sci. 2018 Jan 27;109(2):462–70. doi: 10.1111/cas.13467 (PMC5797824; doi:10.1111/cas.13467), 2018-01-27
Supplement: CAS-109-462-s001.pdf [file CAS-109-462-s001.pdf]

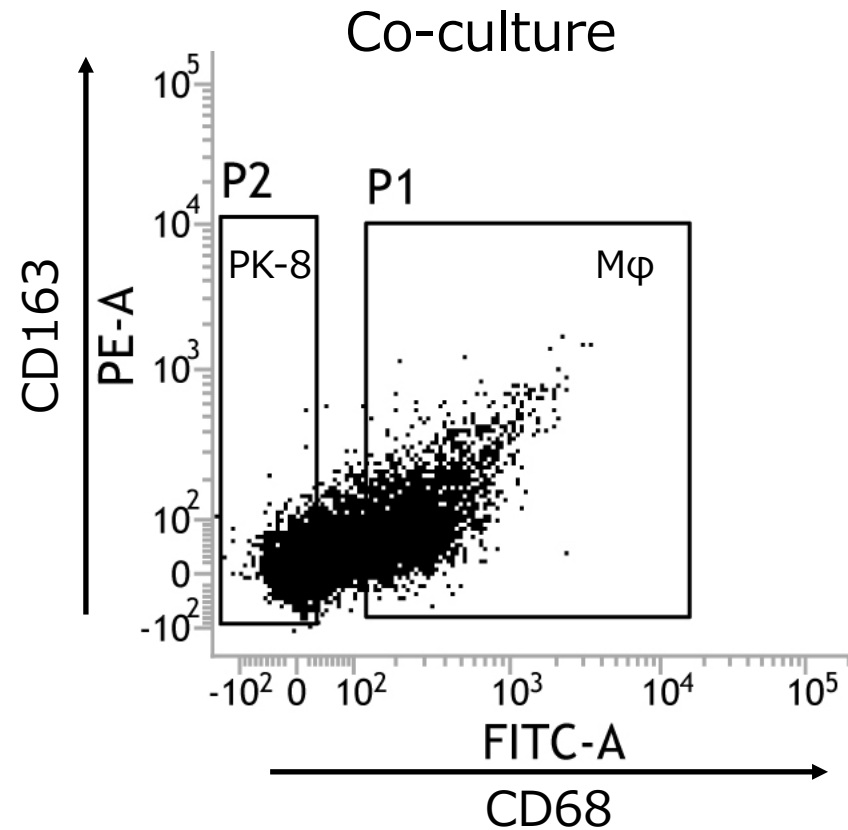

**Fig. S1: Flow cytometry of co-cultured PK-8 cells and macrophage**  
Expression levels of CD68 and CD163 in co-cultured PK-8 cells and macrophages. Macrophages were identified by high CD68 expression, and PK-8 cells were identified by low CD68 expression.
